# Supplementary material for: Enhanced photoelectrochemical performance of quantum dot-sensitized TiO2 nanotube arrays with Al2O3 overcoating by atomic layer deposition
Source: Royal Society of Chemistry journal article supplement (doi:10.1039/c6cp01299j), 2016-01-01
Supplement: c6cp01299j1.pdf [file c6cp01299j1.pdf]

## Supporting Information

# Enhanced Photoelectrochemical Performance of Quantum Dot-Sensitized TiO<sub>2</sub> Nanotube Arrays with Al<sub>2</sub>O<sub>3</sub> overcoating by Atomic Layer Deposition

Min Zeng<sup>a</sup>, Xiang Peng<sup>a</sup>, Jianjun Liao<sup>a</sup>, Guizhen Wang<sup>b\*</sup>, Yanfang Li<sup>a</sup>,  
Jianbao Li<sup>a</sup>, Yong Qin<sup>c</sup>, Joshua Wilson<sup>d</sup>, Aimin Song<sup>d</sup> and Shiwei Lin<sup>a,b\*</sup>

<sup>a</sup> Key Laboratory of Ministry of Education for Advanced Materials in Tropical Island Resources, College of Materials and Chemical Engineering, Hainan University, Haikou 570228, China

<sup>b</sup> Key Laboratory of Tropical Biological Resources of Ministry of Education, Hainan University, Haikou 570228, China

<sup>c</sup> State Key Laboratory of Coal Conversion, Institute of Coal Chemistry, Chinese Academy of Sciences, Taiyuan 030001, China

<sup>d</sup> School of Electrical and Electronic Engineering, University of Manchester, Sackville Street Building, Manchester M13 9PL, UK

<sup>a,d\*</sup>Corresponding Author: Prof. S. Lin. (linsw@hainu.edu.cn)

<sup>b\*</sup> Corresponding Author: Prof. G. Wang. (wangguizhen0@hotmail.com)

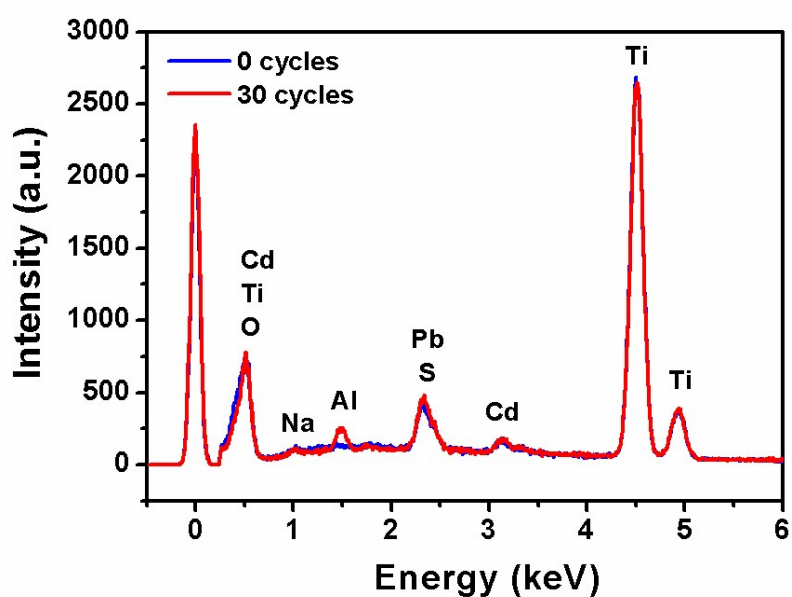

**Fig. S1.** EDS results of quantum dot-sensitized TiO<sub>2</sub> nanotube arrays without Al<sub>2</sub>O<sub>3</sub> deposition (blue) and with 30 ALD cycles of Al<sub>2</sub>O<sub>3</sub> overlayer (red). Na comes from the Na<sub>2</sub>S used as the precursor.

**Table S1.** Atomic percentages of the elements derived from the EDS spectra in Fig. S1.

| Photoanodes   | Ti    | O     | Al   | Na   | Pb   | Cd   | S    |
|---------------|-------|-------|------|------|------|------|------|
| 0 cycles [%]  | 32.72 | 64.82 | 0.00 | 0.41 | 0.47 | 0.52 | 1.06 |
| 30 cycles [%] | 35.07 | 62.19 | 0.67 | 0.00 | 0.45 | 0.44 | 1.17 |

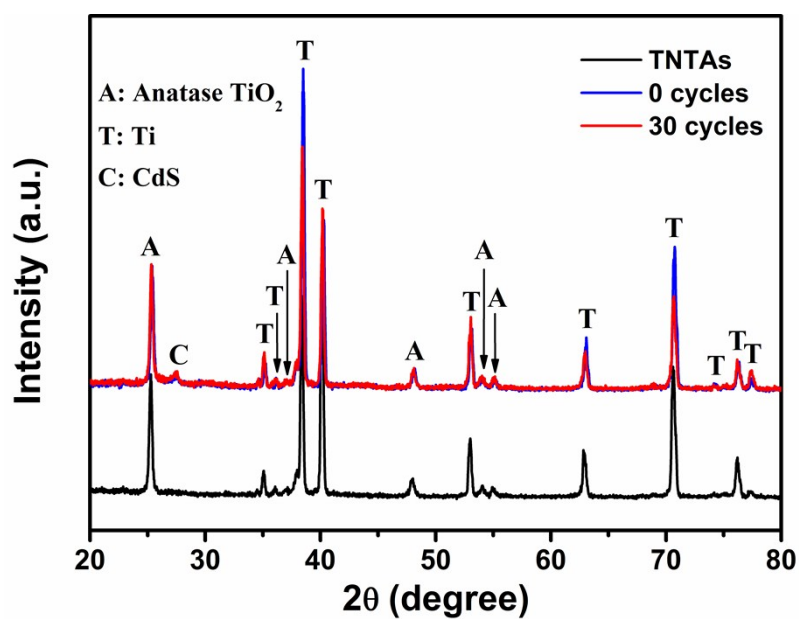

**Fig. S2.** XRD patterns of pure  $\text{TiO}_2$  nanotube arrays (TNTAs, black), quantum dot-sensitized  $\text{TiO}_2$  nanotube arrays without  $\text{Al}_2\text{O}_3$  deposition (blue) and with 30 ALD cycles of  $\text{Al}_2\text{O}_3$  overlayer (red).

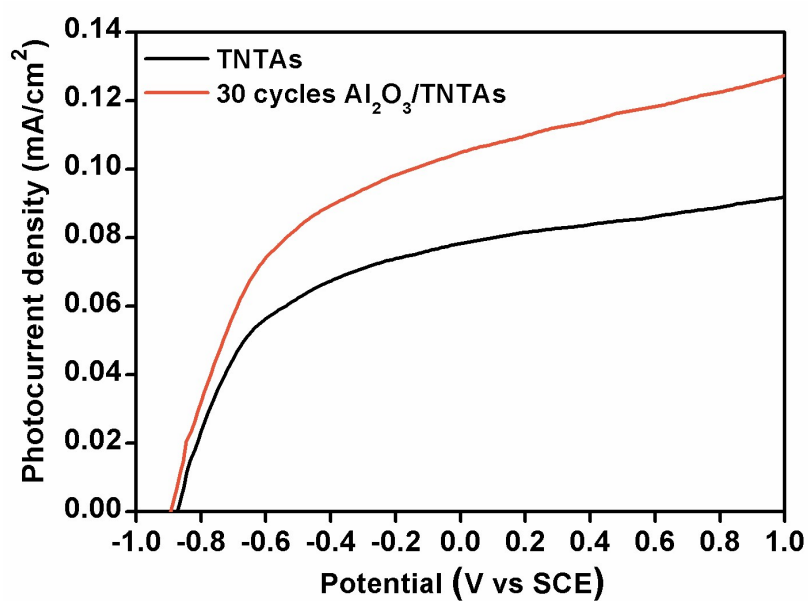

**Fig. S3.** Linear sweep voltammograms measured from pure  $\text{TiO}_2$  nanotube arrays without  $\text{Al}_2\text{O}_3$  deposition (TNTAs, black) and with 30 ALD cycles of  $\text{Al}_2\text{O}_3$  (orange) under simulated solar illumination ( $100 \text{ mW cm}^{-2}$ , AM 1.5 G) at a scan rate of  $10 \text{ mV s}^{-1}$ .

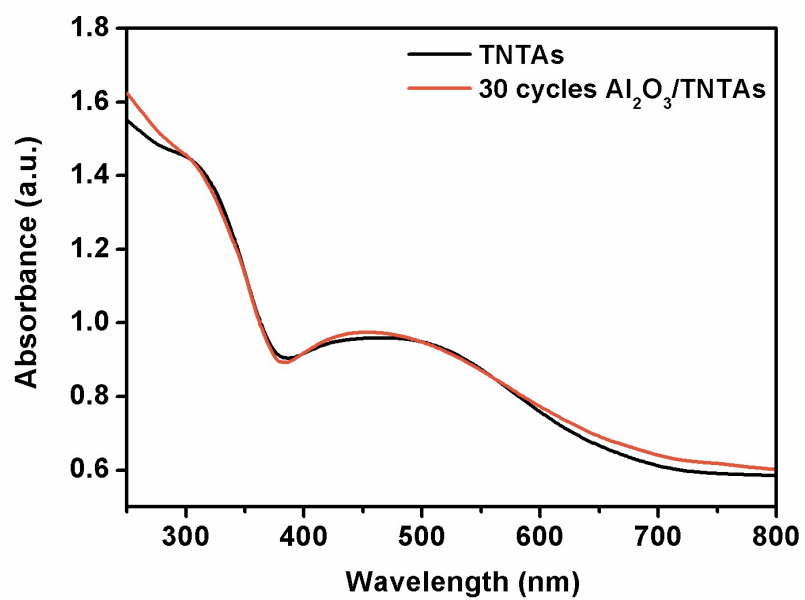

**Fig. S4.** UV-visible absorption spectra of the pure TiO<sub>2</sub> nanotube arrays without Al<sub>2</sub>O<sub>3</sub> deposition (TNTAs, black) and with 30 ALD cycles of Al<sub>2</sub>O<sub>3</sub> overlayer (orange).

### Mott-Schottky analysis of photoanode:

The Mott-Schottky analysis was performed on quantum dot-sensitized TiO<sub>2</sub> nanotube arrays before and after Al<sub>2</sub>O<sub>3</sub> deposition at a fixed frequency of 800 Hz with a perturbation amplitude of 10 mV and a scan rate of 30 mV s<sup>-1</sup>. The electrolyte was 0.1 M Na<sub>2</sub>SO<sub>4</sub> aqueous solution.

The Mott-Schottky equation correlates the inverse of the square capacitance with the donor density,  $N_D$ , and the flat band potential,  $V_{FB}$ , starting from Poisson's equation coupled with Boltzmann's distribution to describe the distribution of charges in the space charge region and Gauss' law relating the electric field at the interface [S1]. The Mott-Schottky equation is described by [S2]:

$$\frac{1}{C^2} = \left( \frac{2}{e\epsilon_0\epsilon_s N_D} \right) \left[ (V - V_{FB}) - \frac{k_B T}{e} \right]$$

where  $C$  is the space charge capacitance in the semiconductor,  $e$  is the elemental charge constant,  $\epsilon_0$  is the permittivity of free space,  $\epsilon_s$  is the dielectric constant of the semiconductor,  $V$  is the applied potential,  $k_B$  is the Boltzmann constant, and  $T$  is the absolute temperature. The Mott-Schottky analysis of the space charge capacitance is performed in the linear region of the  $C^{-2}$  vs potential plot. A dielectric constant  $\epsilon = 48$  for TiO<sub>2</sub> is used to extract the flat band potential and the donor density of the photoanode without Al<sub>2</sub>O<sub>3</sub> deposition (blue squares in Fig. S5) and the photoanode with 30 ALD cycles of Al<sub>2</sub>O<sub>3</sub> overlayer (red triangles in Fig. S5) [S3].

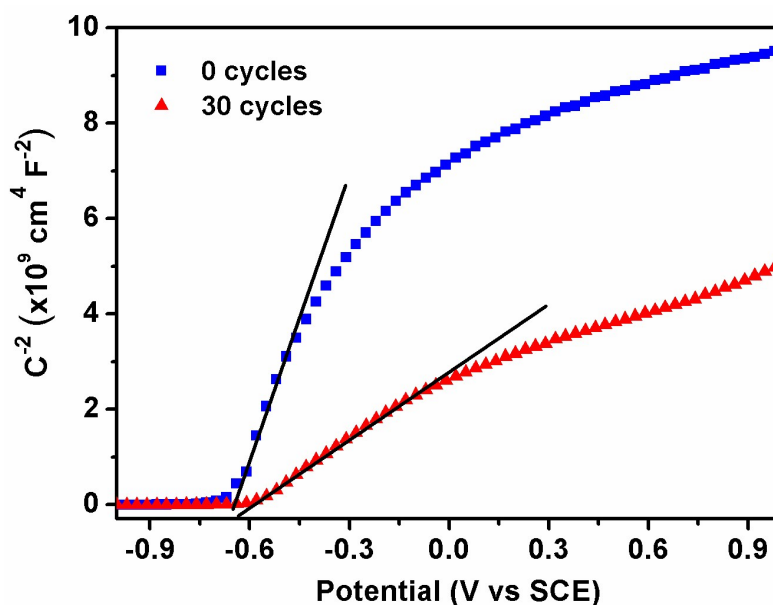

**Fig. S5.** Mott-Schottky analysis of quantum dot-sensitized TiO<sub>2</sub> nanotube arrays without Al<sub>2</sub>O<sub>3</sub> deposition (blue squares) and with 30 ALD cycles of

Al<sub>2</sub>O<sub>3</sub> overlayer (red triangles). The inverse of the square space charge capacitance is plotted vs the potential applied during the impedance measurement.

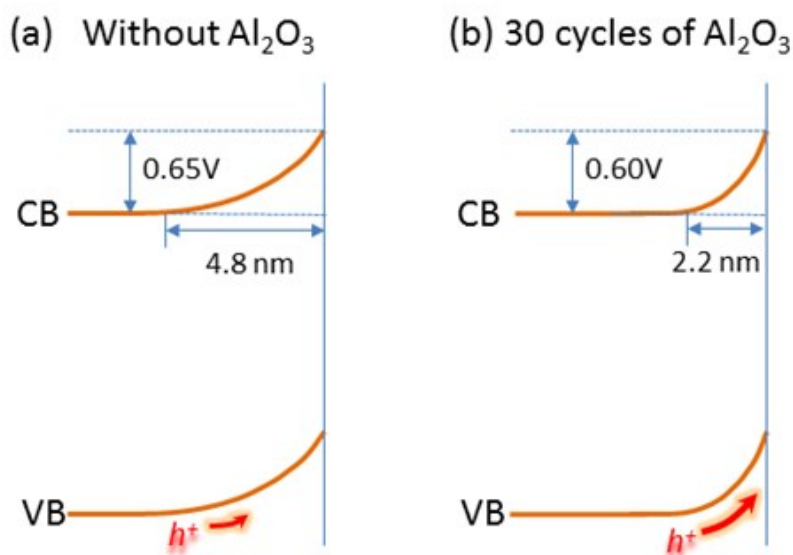

**Fig. S6.** Schematic band diagrams near surface based on the calculated electronic parameters for the photoelectrodes (a) without Al<sub>2</sub>O<sub>3</sub> deposition and (b) with 30 ALD cycles of Al<sub>2</sub>O<sub>3</sub> overlayer. The size of the arrow presents the strength of the effect from built-in electric field.

**Table S2.** EIS fitting results.

| Photoanode | $R_s/\Omega$ | $R_{ct}/\Omega$ | CPE/F                |
|------------|--------------|-----------------|----------------------|
| 0 cycles   | 9.0          | 207.8           | $1.9 \times 10^{-3}$ |
| 30 cycles  | 8.8          | 145.0           | $2.4 \times 10^{-3}$ |

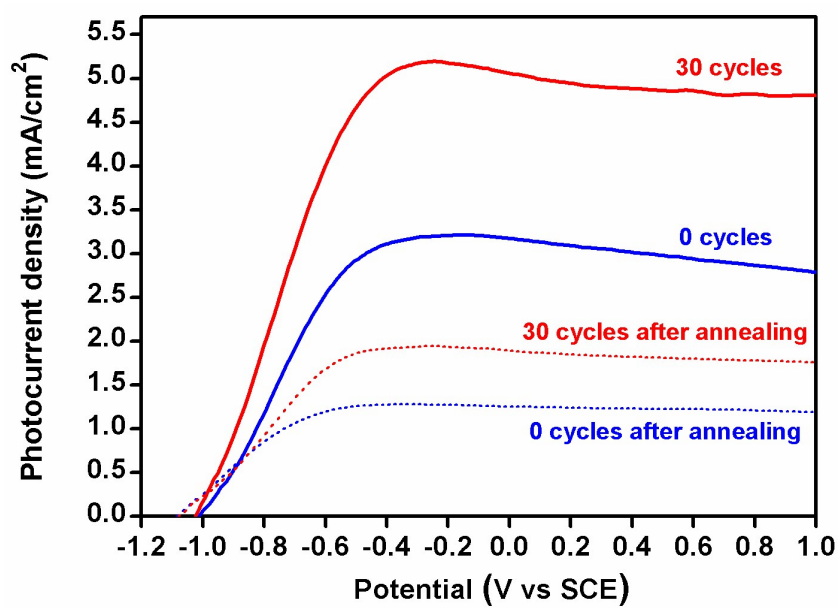

**Fig. S7.** Photocurrent density-potential curves of quantum dot-sensitized TiO<sub>2</sub> nanotube arrays with 0 cycles (blue) and 30 cycles (red) of Al<sub>2</sub>O<sub>3</sub> overlayer before (solid lines) and after (dot lines) annealing at 400 °C.

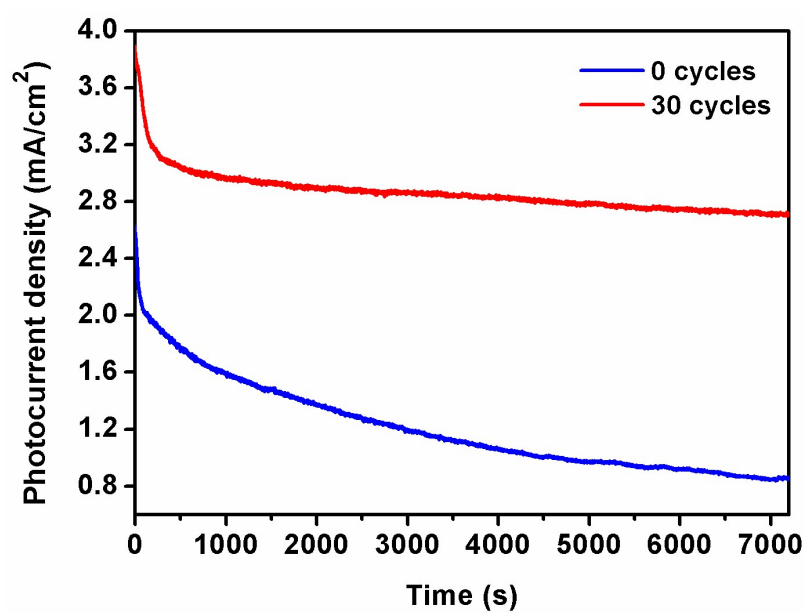

**Fig. S8.** Time-dependence photocurrent density of the quantum dot-sensitized TiO<sub>2</sub> nanotube array photoelectrodes without Al<sub>2</sub>O<sub>3</sub> deposition (blue) and with 30 ALD cycles of Al<sub>2</sub>O<sub>3</sub> overlayer (red).

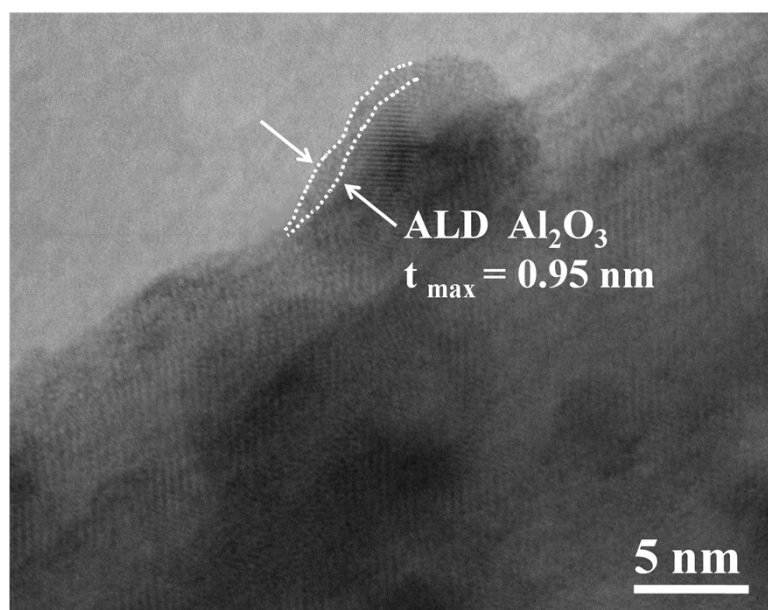

**Fig. S9.** High-resolution TEM image of quantum dot-sensitized TiO<sub>2</sub> nanotube arrays with 30 ALD cycles of Al<sub>2</sub>O<sub>3</sub> overlayer after PEC test.

## References

- [S1] F. Le Formal, N. Tétreault, M. Cornuz, T. Moehl, M. Grätzel, K. Sivula, *Chem. Sci.* 2 (2011) 737-743.
- [S2] A. Wolcott, W. A. Smith, T. R. Kuykendall, Y. Zhao, J. Z. Zhang, *Adv. Funct. Mater.* 19 (2009) 1849-1856.
- [S3] M. Ye, J. Gong, Y. Lai, C. Lin, Z. Lin, *J. Am. Chem. Soc.* 134 (2012) 15720-15723.
